# Supplementary material for: The effectiveness of PD-1 inhibitors in non-small cell lung cancer (NSCLC) patients of different ages
Source: PubMed Central journal article supplement (PMC5814271; doi:10.18632/oncotarget.23678), 2017-12-26
Supplement: oncotarget-09-7942-s001.pdf [file oncotarget-09-7942-s001.pdf]

# The effectiveness of PD-1 inhibitors in non-small cell lung cancer (NSCLC) patients of different ages

## SUPPLEMENTARY MATERIALS

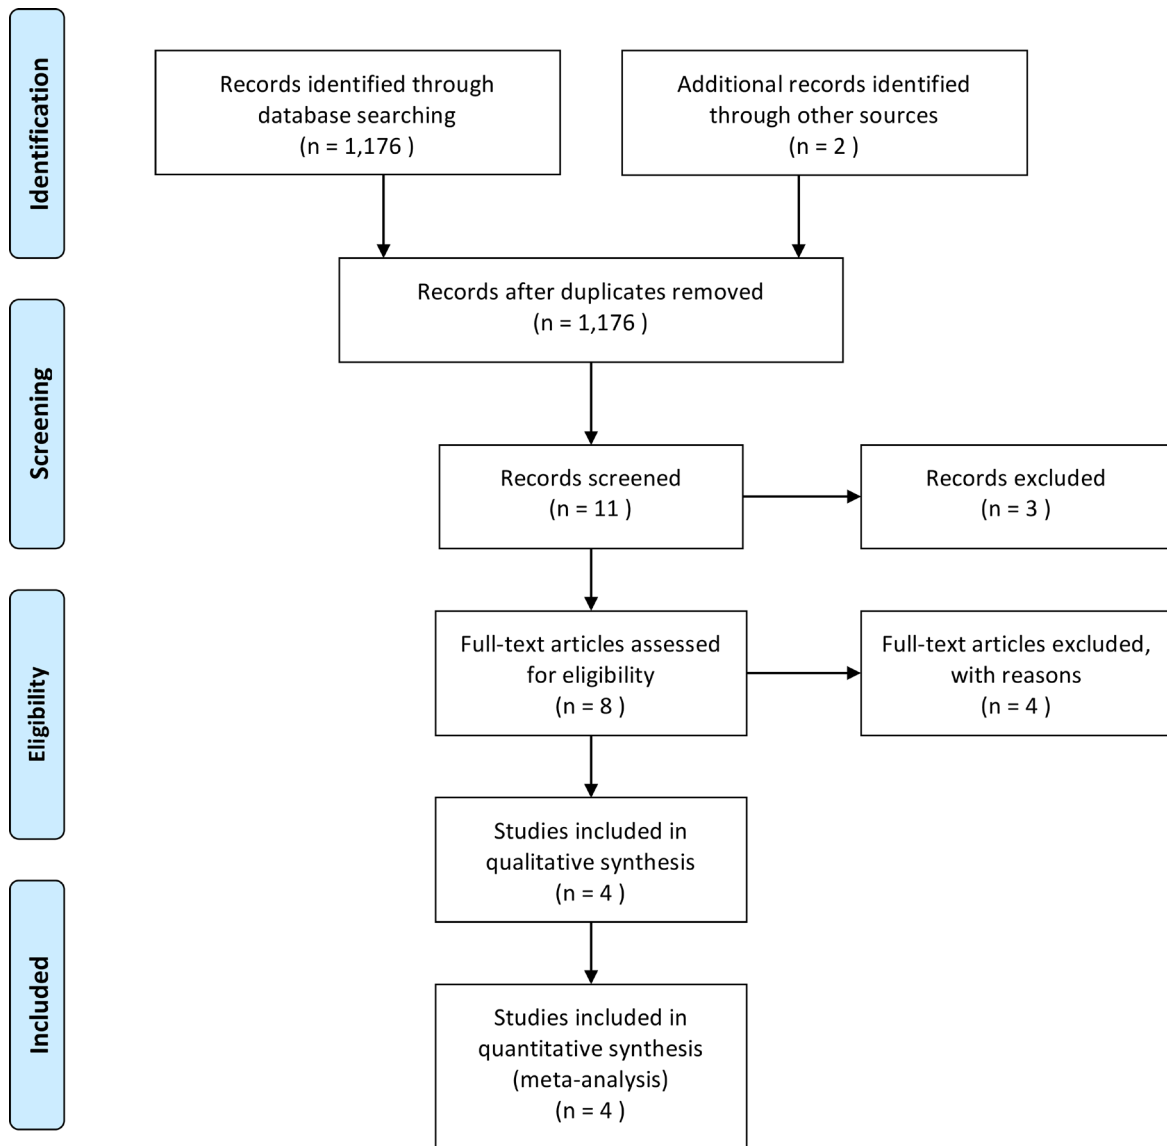

Supplementary Figure 1: The process of trial selection.

|               | Random sequence generation (selection bias) | Allocation concealment (selection bias) | Blinding of participants and personnel (performance bias) | Blinding of outcome assessment (detection bias) | Incomplete outcome data (attrition bias) | Selective reporting (reporting bias) | Other bias |
|---------------|---------------------------------------------|-----------------------------------------|-----------------------------------------------------------|-------------------------------------------------|------------------------------------------|--------------------------------------|------------|
| Borghaei 2015 | +                                           | ?                                       | -                                                         | +                                               | +                                        | +                                    | +          |
| Brahmer 2015  | +                                           | ?                                       | -                                                         | +                                               | +                                        | +                                    | +          |
| Herbst 2016   | +                                           | ?                                       | +                                                         | ?                                               | +                                        | +                                    | +          |
| Reck 2016     | +                                           | ?                                       | -                                                         | ?                                               | +                                        | +                                    | +          |

Supplementary Figure 2: Quality assessment of the included studies.
